# Supplementary material for: CDH1 and IL1-beta expression dictates FAK and MAPKK-dependent cross-talk between cancer cells and human mesenchymal stem cells
Source: Stem Cell Res Ther. 2015 Jul 24;6(1):135. doi: 10.1186/s13287-015-0123-0 (PMC4533790; doi:10.1186/s13287-015-0123-0)
Supplement: Additional file 4: — Is Table S4 presenting genes differentially expressed between positive and negative tumors. (XLSX 31 kb) [file 13287_2015_123_MOESM4_ESM.xlsx]

## Sheet: up and down 2.0 FC  0.05 P
Table S4: Differentially expressed genes between positive and negative tumors
Probe Set ID	FC ([POSITIVE] vs [NEGATIVE])	Regulation	Gene Symbol
223551_at	16.4424	up	PKIB
202718_at	12.4787	up	IGFBP2
1553602_at	12.3054	up	MUCL1
230964_at	10.7303	up	FREM2
201130_s_at	9.08835	up	CDH1
229623_at	8.94433	up
217028_at	8.40861	up	CXCR4
204105_s_at	8.27984	up	NRCAM
205769_at	7.4868	up	SLC27A2
1555383_a_at	7.29527	up	POF1B
225841_at	7.17774	up	HENMT1
218704_at	7.04405	up	RNF43
205768_s_at	6.74572	up	SLC27A2
218559_s_at	6.63155	up	MAFB
219127_at	6.34326	up	PRR15L
228010_at	6.19901	up	PPP2R2C
204798_at	5.85428	up	MYB
223168_at	5.6609	up	RHOU
233401_at	5.42085	up
238956_at	5.39539	up	EFNA2
51158_at	5.32632	up	FAM174B
223574_x_at	5.28643	up	PPP2R2C
241652_x_at	5.25095	up	LIN7A
221880_s_at	5.21711	up	FAM174B
229215_at	5.18904	up	ASCL2
205759_s_at	5.07939	up	SULT2B1
225240_s_at	5.05794	up	MSI2
211421_s_at	5.0569	up	RET
214157_at	4.96451	up	GNAS
201236_s_at	4.87094	up	BTG2
226134_s_at	4.74634	up
239911_at	4.72465	up	ONECUT2
212239_at	4.72308	up	PIK3R1
214308_s_at	4.6165	up	HGD
230361_at	4.61125	up	HEATR7A///LOC100652949///LOC377711
231120_x_at	4.57185	up	PKIB
233446_at	4.51632	up	ONECUT2
229427_at	4.35835	up	SEMA5A
205221_at	4.34386	up	HGD
228762_at	4.25913	up	LFNG
225237_s_at	4.25416	up	MSI2
230104_s_at	4.23773	up	TPPP
222496_s_at	4.17693	up	RBM47
212240_s_at	4.16308	up	PIK3R1
230271_at	4.09676	up	ONECUT2
211919_s_at	4.08219	up	CXCR4
1552364_s_at	4.07972	up	MSI2
205316_at	3.9143	up	SLC15A2
203627_at	3.9082	up	IGF1R
238116_at	3.89799	up	DYNLRB2
212062_at	3.87883	up	ATP9A
231923_at	3.87805	up	TMEM150C
208161_s_at	3.86666	up	ABCC3
225458_at	3.83361	up	PP7080
203911_at	3.81278	up	RAP1GAP
209641_s_at	3.7551	up	ABCC3
203628_at	3.74639	up	IGF1R
243579_at	3.65672	up	MSI2
236967_at	3.62877	up	LOC645249
229372_at	3.62817	up	GOLT1A
225283_at	3.6279	up	ARRDC4
226137_at	3.61408	up	ZFHX3
237594_at	3.59214	up
228434_at	3.58509	up	BTNL9
211597_s_at	3.5771	up	HOPX
209062_x_at	3.5712	up	NCOA3
218245_at	3.57031	up	TSKU
227230_s_at	3.5603	up	KIAA1211
235421_at	3.53743	up	MAP3K8
1554314_at	3.51169	up	C6orf141
210389_x_at	3.50472	up	TUBD1
225330_at	3.46369	up	IGF1R
243240_at	3.45124	up
212249_at	3.36789	up	PIK3R1
222670_s_at	3.36754	up	MAFB
223571_at	3.27633	up	C1QTNF6
242738_s_at	3.24291	up	ZFHX3
219155_at	3.22546	up	PITPNC1
1557222_at	3.19112	up
201884_at	3.18961	up	CEACAM5
243010_at	3.18799	up	MSI2
1568838_at	3.18526	up	WASIR2
239232_at	3.18464	up	MSI2
219551_at	3.17657	up	EAF2
205879_x_at	3.10937	up	RET
232083_at	3.09052	up	KIF16B
244646_at	3.08617	up
224336_s_at	3.08207	up	DUSP16
228719_at	3.06416	up	ZSWIM7
225549_at	3.05041	up	DDX6
206754_s_at	3.02672	up	CYP2B6///CYP2B7P1
210655_s_at	3.02626	up	FOXO3///FOXO3B
230894_s_at	2.99911	up
225270_at	2.99564	up	NEO1
226431_at	2.99428	up	FAM117B
237031_at	2.97916	up
242444_at	2.97759	up	C1QTNF6
204039_at	2.967	up	CEBPA
220936_s_at	2.95549	up	H2AFJ
1562836_at	2.94865	up	DDX6
218346_s_at	2.94118	up	SESN1
223695_s_at	2.923	up	ARSD
204132_s_at	2.92226	up	FOXO3///FOXO3B
1555370_a_at	2.8984	up	CAMTA1
234394_at	2.88065	up	ZNF124
221638_s_at	2.86215	up	STX16
235583_at	2.86187	up	ILDR1
221194_s_at	2.84366	up	RNFT1
212692_s_at	2.83387	up	LRBA
1552330_at	2.82043	up	CENPBD1
218689_at	2.79653	up	FANCF
224482_s_at	2.79488	up	RAB11FIP4
212113_at	2.78555	up	ATXN7L3B
219143_s_at	2.77374	up	RPP25
208653_s_at	2.76004	up	CD164
90265_at	2.74509	up	ADAP1
239991_at	2.73018	up
223275_at	2.72922	up	PRMT6
215771_x_at	2.71427	up	RET
207130_at	2.67183	up	ZMYND8
1565598_at	2.6661	up
209624_s_at	2.64298	up	MCCC2
218010_x_at	2.63137	up	PPDPF
224889_at	2.62382	up	FOXO3
218928_s_at	2.60593	up	SLC37A1
222811_at	2.5939	up	FTSJD1
220744_s_at	2.57876	up	IFT122
225598_at	2.57777	up	SLC45A4
225739_at	2.57051	up	RAB11FIP4
224832_at	2.56037	up	DUSP16
209605_at	2.54958	up	TST
225457_s_at	2.54907	up	LINC00263///PP7080
225628_s_at	2.54591	up	MLLT6
236124_at	2.54239	up	LOC153546
214109_at	2.53936	up	LRBA
225286_at	2.5377	up	ARSD
223696_at	2.53352	up	ARSD
214795_at	2.52019	up	ZMYND8
207392_x_at	2.51444	up	UGT2B15
1567032_s_at	2.51043	up	ZNF160
202550_s_at	2.49558	up	VAPB
204131_s_at	2.49287	up	FOXO3
201043_s_at	2.48421	up	ANP32A
223874_at	2.47918	up	ACTR3C
225754_at	2.47641	up	AP1G1
221836_s_at	2.44802	up	TRAPPC9
229243_at	2.43847	up
243973_at	2.43469	up
224998_at	2.43242	up	CMTM4
225009_at	2.43041	up	CMTM4
210281_s_at	2.42426	up	ZMYM2
205361_s_at	2.42178	up	PFDN4
1555408_at	2.40562	up	BAGE2///BAGE4
229068_at	2.40541	up	CCT5
212235_at	2.39476	up	PLXND1
1561433_at	2.39052	up	CCDC74B-AS1
224874_at	2.38661	up	POLR1D
204321_at	2.3838	up	NEO1
223246_s_at	2.38254	up	STRBP
232423_at	2.38245	up	ARSD
218195_at	2.37987	up	C6orf211
233252_s_at	2.3771	up	STRBP
223777_at	2.37629	up	DDX11L2
225266_at	2.34552	up	ZNF652
36830_at	2.32425	up	MIPEP
225892_at	2.32342	up	IREB2
209048_s_at	2.32209	up	ZMYND8
226345_at	2.31153	up	ARL5B
201535_at	2.30633	up	UBL3
1568949_at	2.30053	up	PITPNC1
201708_s_at	2.29818	up	NIPSNAP1
227569_at	2.29726	up	LNX2
209431_s_at	2.29636	up	PATZ1
213352_at	2.29587	up	TMCC1
1552740_at	2.29535	up	C2orf15///MRPL30
204999_s_at	2.29001	up	ATF5
224891_at	2.28946	up	FOXO3
228870_at	2.27668	up	FAM84B
1552287_s_at	2.27178	up	AFG3L1P
202971_s_at	2.24703	up	DYRK2
227459_at	2.24249	up
209049_s_at	2.24107	up	ZMYND8
223728_at	2.23494	up	CENPBD1
210282_at	2.2266	up	ZMYM2
225499_at	2.22529	up	RALGAPA2
210932_s_at	2.22183	up	RNF6
221794_at	2.22133	up	DOCK6
230131_x_at	2.21029	up	ARSD
225280_x_at	2.21011	up	ARSD
227994_x_at	2.20764	up	PPDPF
1568877_a_at	2.19166	up	ACBD5
216389_s_at	2.18896	up	DCAF11
201534_s_at	2.18891	up	UBL3
228992_at	2.18236	up	MED28
239083_at	2.18187	up	ZNF786
219150_s_at	2.18016	up	ADAP1
204305_at	2.1668	up	MIPEP
200688_at	2.16676	up	SF3B3
202968_s_at	2.16602	up	DYRK2
212420_at	2.15319	up	ELF1
209112_at	2.15028	up	CDKN1B
225301_s_at	2.14863	up	MYO5B
225376_at	2.14797	up	C20orf11
1558710_at	2.14337	up
1555037_a_at	2.13162	up	IDH1
1553647_at	2.1306	up	CDYL2
218392_x_at	2.12757	up	SFXN1
212277_at	2.12724	up	MTMR4
228899_at	2.12692	up
211358_s_at	2.1248	up	CIZ1
215185_at	2.12322	up	LOC100128077///LOC100506190
210555_s_at	2.11949	up	NFATC3
229440_at	2.11746	up	RBM47
226639_at	2.11654	up	SFT2D3
223245_at	2.115	up	STRBP
34225_at	2.11254	up	MIR943///WHSC2
225494_at	2.11226	up
204480_s_at	2.11123	up	C9orf16
1558249_s_at	2.11045	up	STX16
212418_at	2.10677	up	ELF1
221219_s_at	2.10584	up	KLHDC4///LOC100652950///LOC100653213
226605_at	2.10462	up	DGKQ
233571_x_at	2.10395	up	PPDPF
204336_s_at	2.09486	up	RGS19
200687_s_at	2.08622	up	SF3B3
239716_at	2.08559	up
202576_s_at	2.08362	up	DDX19A///DDX19B
221656_s_at	2.07865	up	ARHGEF10L
201000_at	2.07089	up	AARS
220215_at	2.06901	up	ZNF669
214268_s_at	2.06893	up	MTMR4
214583_at	2.06738	up	DDI2///RSC1A1
201647_s_at	2.06603	up	SCARB2
222705_s_at	2.05268	up	SLC25A15
229732_at	2.05011	up	ZNF823
238920_at	2.04654	up
203112_s_at	2.04006	up	MIR943///WHSC2
238915_at	2.03957	up
202778_s_at	2.03829	up	ZMYM2
203806_s_at	2.03775	up	FANCA
201835_s_at	2.03671	up	PRKAB1
218947_s_at	2.02309	up	MTPAP
225139_at	2.02154	up	NFATC3
1560224_at	2.02048	up	AHCTF1
224857_s_at	2.0093	up	POLR1D
210625_s_at	2.00765	up	AKAP1
243552_at	2.00066	up	MBTD1
227413_at	-2.00638	down	UBLCP1
225558_at	-2.01123	down	GIT2
213742_at	-2.01239	down	SRSF11
223219_s_at	-2.01585	down	CNOT10
219421_at	-2.0182	down	TTC33
229126_at	-2.02405	down	TMEM19
226077_at	-2.03728	down	RNF145
224919_at	-2.04534	down	MRPS6
230728_at	-2.07032	down	FKBP14
230172_at	-2.0745	down	IFI27L1
238597_at	-2.07472	down	ANKRD13C
235685_at	-2.08367	down
212765_at	-2.09345	down	CAMSAP2
219952_s_at	-2.09875	down	MCOLN1
204085_s_at	-2.10193	down	CLN5
227263_at	-2.10473	down	C8orf58
208971_at	-2.11316	down	UROD
243256_at	-2.12593	down	MKNK1
220576_at	-2.12943	down	PGAP1
222479_s_at	-2.15031	down	DYNC1LI1
219148_at	-2.15093	down	PBK
200905_x_at	-2.18246	down	HLA-E
202787_s_at	-2.18448	down	MAPKAPK3
241908_at	-2.19223	down	BROX
227193_at	-2.19932	down	SLC30A4
200931_s_at	-2.21851	down	VCL
224953_at	-2.2207	down	YIPF5
226893_at	-2.22821	down	ABL2
227022_at	-2.2402	down	GNPDA2
225272_at	-2.2733	down	SAT2
229504_at	-2.27919	down
226393_at	-2.29116	down	CYP2U1
227687_at	-2.29708	down	HYLS1
227468_at	-2.30295	down	CPT1C
214888_at	-2.30626	down	CAPN2
202788_at	-2.30975	down	MAPKAPK3
226104_at	-2.31744	down	RNF170
238001_at	-2.32693	down	KCTD6
215515_at	-2.33514	down
1559883_s_at	-2.34894	down	SAMHD1
208970_s_at	-2.35294	down	UROD
1554076_s_at	-2.36449	down	TMEM136
211792_s_at	-2.37775	down	CDKN2C
209717_at	-2.38674	down	EVI5
225950_at	-2.39329	down	SAMD8
231274_s_at	-2.39446	down
220985_s_at	-2.39717	down	RNF170
222376_at	-2.40179	down
241938_at	-2.40314	down	QKI
203596_s_at	-2.41466	down	IFIT5
230000_at	-2.41786	down	RNF213
218136_s_at	-2.41866	down	SLC25A37
231871_at	-2.42882	down	GPR180
222529_at	-2.44975	down	SLC25A37
231411_at	-2.46513	down	LHFP
208683_at	-2.48549	down	CAPN2
213164_at	-2.4888	down	SLC5A3
209575_at	-2.5265	down	IL10RB
212613_at	-2.53229	down	BTN3A2
224927_at	-2.53283	down	PPP1R18
210385_s_at	-2.53648	down	ERAP1
204079_at	-2.54112	down	TPST2
200788_s_at	-2.56546	down	PEA15
226395_at	-2.56657	down	HOOK3
220484_at	-2.56982	down	MCOLN3
242335_at	-2.58154	down	SLC25A37
1566257_at	-2.58822	down	GPR180
206085_s_at	-2.5917	down	CTH
229735_s_at	-2.60079	down	NIPAL3
225876_at	-2.6069	down	NIPAL3
212944_at	-2.61211	down	SLC5A3
204502_at	-2.61632	down	SAMHD1
214543_x_at	-2.65145	down	QKI
204159_at	-2.66297	down	CDKN2C
225875_s_at	-2.6636	down	NIPAL3
236192_at	-2.67386	down	HOOK3
209227_at	-2.68873	down	TUSC3
238949_at	-2.69193	down	RNF145
212195_at	-2.69231	down	IL6ST
223488_s_at	-2.71355	down	GNB4
238077_at	-2.72765	down	KCTD6
209264_s_at	-2.76876	down	TSPAN4
205354_at	-2.79802	down	GAMT
209263_x_at	-2.79806	down	TSPAN4
201380_at	-2.80139	down	CRTAP///LOC100653071
204821_at	-2.80261	down	BTN3A3
212704_at	-2.80373	down	ZCCHC11
1557521_a_at	-2.82571	down
222528_s_at	-2.84483	down	SLC25A37
227410_at	-2.85287	down	FAM43A
219525_at	-2.86669	down	SLC47A1
209706_at	-2.88054	down	NKX3-1
235529_x_at	-2.88688	down	SAMHD1
244533_at	-2.89986	down	PTPN14
201599_at	-2.91121	down	OAT
230713_at	-2.96122	down
202695_s_at	-2.97103	down	STK17A
218017_s_at	-2.98072	down	HGSNAT
228423_at	-2.98419	down	MAP9
226656_at	-3.00602	down	CRTAP
1558116_x_at	-3.02122	down	RECK
222810_s_at	-3.04074	down	RASAL2
204415_at	-3.04855	down	IFI6
219165_at	-3.08218	down	PDLIM2
225755_at	-3.09302	down	KLHDC8B
1555154_a_at	-3.16301	down	QKI
202693_s_at	-3.2172	down	STK17A
223625_at	-3.22298	down	FAM126A
202074_s_at	-3.23774	down	OPTN
239147_at	-3.25437	down	ARSK
1554464_a_at	-3.32247	down	CRTAP///LOC100653071
1555889_a_at	-3.34193	down	CRTAP///LOC100653071
205130_at	-3.34269	down	MOK
234987_at	-3.36968	down	SAMHD1
203595_s_at	-3.3703	down	IFIT5
226059_at	-3.37441	down	TOMM40L
230503_at	-3.39286	down
224352_s_at	-3.39947	down	CFL2
202132_at	-3.39952	down	WWTR1
226282_at	-3.42907	down	PTPN14
228714_at	-3.44358	down
226380_at	-3.44456	down	PTPN21
201968_s_at	-3.44903	down	PGM1
217599_s_at	-3.44965	down	MDFIC
205298_s_at	-3.48953	down	BTN2A2
224663_s_at	-3.53369	down	CFL2
239823_at	-3.53577	down
209122_at	-3.56714	down	LOC100509484///PLIN2
223748_at	-3.57426	down	SLC4A11
1557522_x_at	-3.58242	down
209846_s_at	-3.63184	down	BTN3A2
225046_at	-3.67226	down	LOC389831
214436_at	-3.71428	down	FBXL2
221561_at	-3.75661	down	SOAT1
212262_at	-3.80911	down	QKI
244661_at	-3.81379	down	SOAT1
202912_at	-3.82892	down	ADM
204319_s_at	-3.88305	down	RGS10
227036_at	-3.90507	down	RASAL2
205279_s_at	-3.94656	down	GLRB
202307_s_at	-3.98823	down	TAP1
229797_at	-4.03219	down	MCOLN3
212923_s_at	-4.09663	down	PXDC1
226368_at	-4.1161	down	CHST11
201170_s_at	-4.165	down	BHLHE40
209788_s_at	-4.16862	down	ERAP1
231396_s_at	-4.17933	down	FAM126A
209140_x_at	-4.23651	down	HLA-B
234980_at	-4.26651	down	TMEM56
212845_at	-4.27856	down	SAMD4A
214212_x_at	-4.31007	down	FERMT2
204820_s_at	-4.33229	down	BTN3A2///BTN3A3
207419_s_at	-4.54844	down	RAC2
219634_at	-4.55515	down	CHST11
205364_at	-4.56444	down	ACOX2
212263_at	-4.66814	down	QKI
204836_at	-4.66955	down	GLDC
226743_at	-4.70858	down	SLFN11
209209_s_at	-4.74539	down	FERMT2
205120_s_at	-4.7621	down	SGCB
223843_at	-4.79887	down	SCARA3
205439_at	-4.87709	down	GSTT2
213340_s_at	-4.88654	down	TP73-AS1
209627_s_at	-5.01297	down	OSBPL3
228479_at	-5.02081	down	SOAT1
212636_at	-5.02429	down	QKI
1552701_a_at	-5.09288	down	CARD16
226001_at	-5.19291	down	KLHL5
225796_at	-5.21655	down	PXK
202644_s_at	-5.28255	down	TNFAIP3
213238_at	-5.31283	down	ATP10D
206027_at	-5.38788	down	S100A3
202086_at	-5.40639	down	MX1
227565_at	-5.51874	down	KLHL5
231579_s_at	-5.53771	down	TIMP2
225793_at	-5.64033	down	LIX1L
205280_at	-5.74487	down	GLRB
212265_at	-5.74678	down	QKI
212992_at	-5.78613	down	AHNAK2
1559942_at	-5.85302	down	MDFIC
223599_at	-5.91906	down	TRIM6
1552274_at	-5.95024	down	PXK
210692_s_at	-6.00141	down	SLC43A3
212526_at	-6.01303	down	SPG20
209228_x_at	-6.10601	down	TUSC3
226372_at	-6.28227	down	CHST11
225782_at	-6.36231	down	MSRB3
1552275_s_at	-6.54153	down	PXK
226103_at	-6.55901	down	NEXN
219863_at	-6.66885	down	HERC5
206295_at	-6.66967	down	IL18
1552309_a_at	-6.68533	down	NEXN
226757_at	-6.69923	down	IFIT2
202133_at	-6.91022	down	WWTR1
232297_at	-6.9167	down	KLHL5
213194_at	-7.15245	down	ROBO1
201289_at	-7.19526	down	CYR61
209210_s_at	-7.24584	down	FERMT2
218656_s_at	-7.32866	down	LHFP
204030_s_at	-7.4631	down	IQCJ-SCHIP1///SCHIP1
210764_s_at	-7.9215	down	CYR61
209626_s_at	-7.9234	down	OSBPL3
213603_s_at	-8.02907	down	RAC2
219522_at	-8.17429	down	FJX1
206170_at	-8.27107	down	ADRB2
203695_s_at	-8.55275	down	DFNA5
225710_at	-8.96954	down	GNB4
212509_s_at	-8.98012	down	MXRA7
213113_s_at	-9.77688	down	SLC43A3
228297_at	-10.0408	down
208146_s_at	-10.1406	down	CPVL
213423_x_at	-10.1473	down	TUSC3
203153_at	-10.1747	down	IFIT1
211675_s_at	-10.6699	down	MDFIC
224710_at	-11.0923	down	NARR///RAB34
204036_at	-11.1158	down	LPAR1
201843_s_at	-11.143	down	EFEMP1
209101_at	-13.3127	down	CTGF
1555630_a_at	-13.9271	down	NARR///RAB34
201105_at	-14.0458	down	LGALS1
212094_at	-14.3331	down	PEG10
201445_at	-14.4683	down	CNN3
204115_at	-15.5239	down	GNG11
204688_at	-21.8371	down	SGCE
212077_at	-24.3244	down	CALD1
201842_s_at	-33.0369	down	EFEMP1
